# Supplementary material for: The protein phosphatase PP6 promotes RIPK1-dependent PANoptosis
Source: PubMed Central journal article supplement (PMC11134900; doi:10.1186/s12915-024-01901-5), 2024-05-29

# Uncropped blots corresponding to Fig. 2

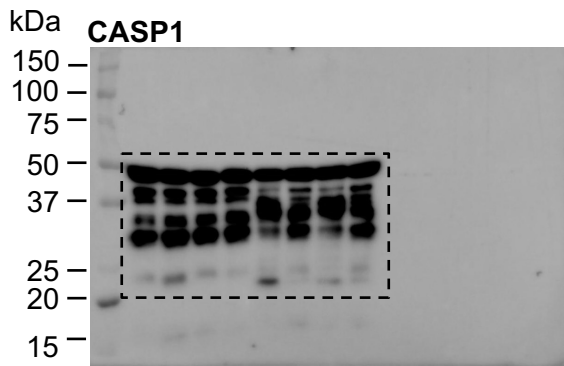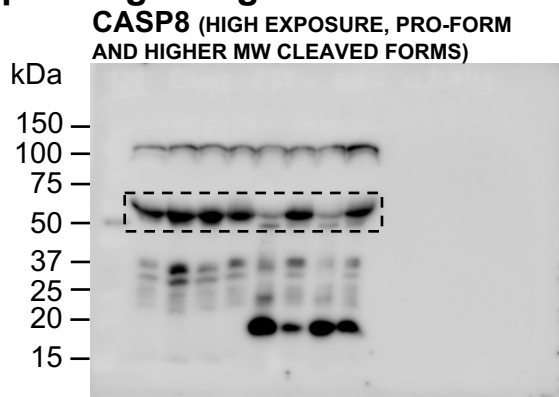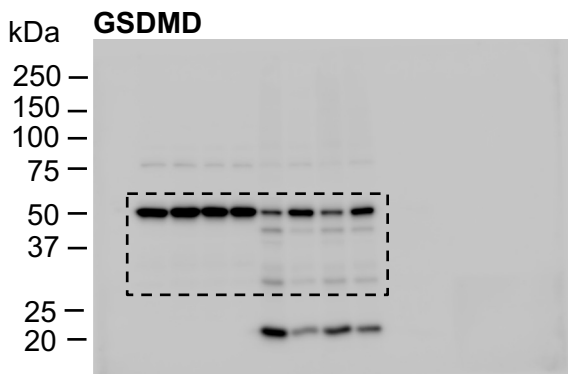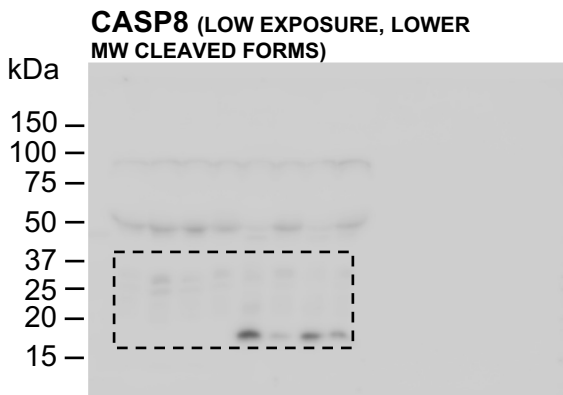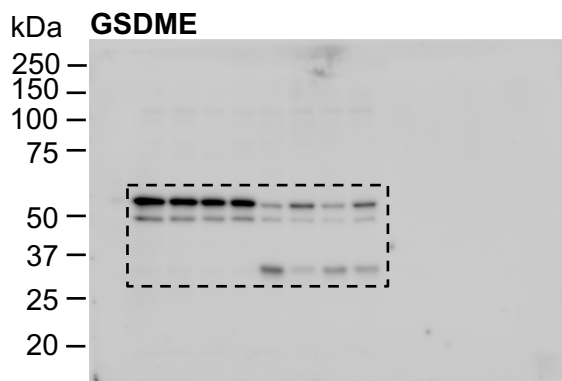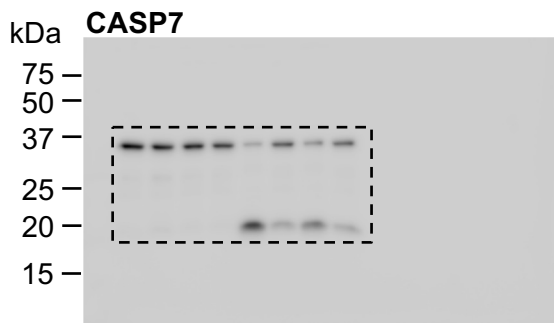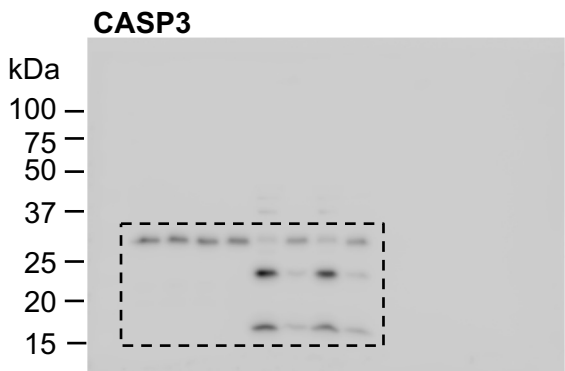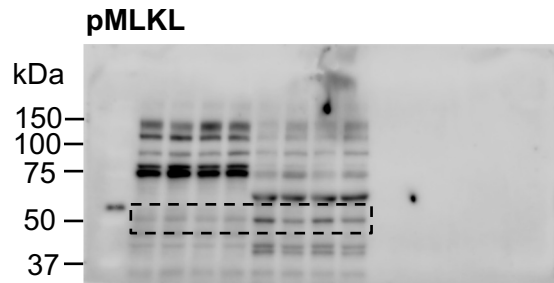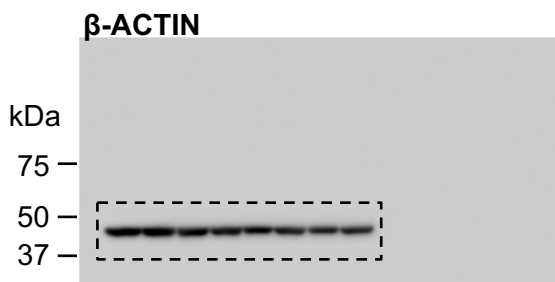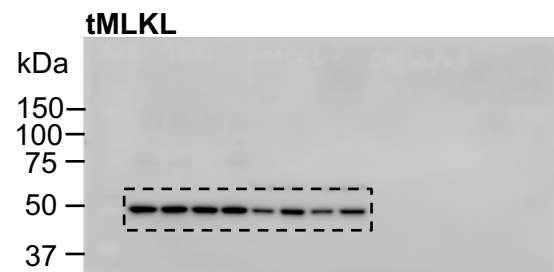

# Uncropped blots corresponding to Fig. 3A

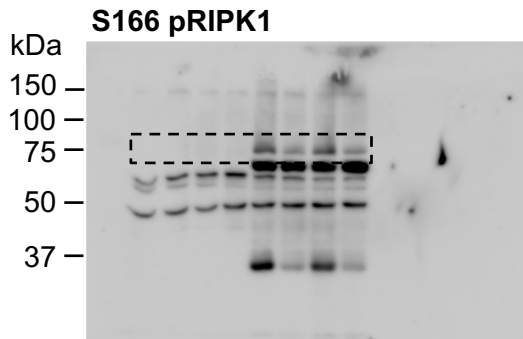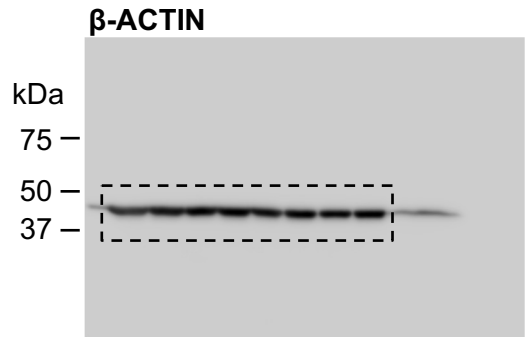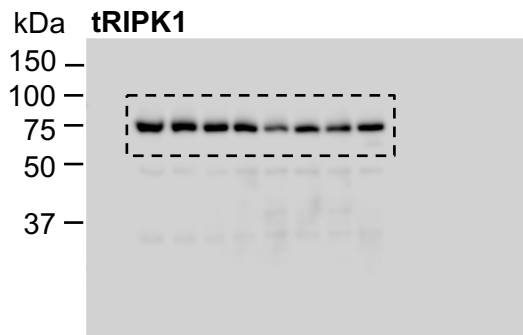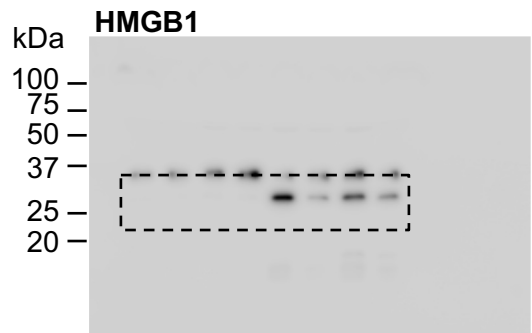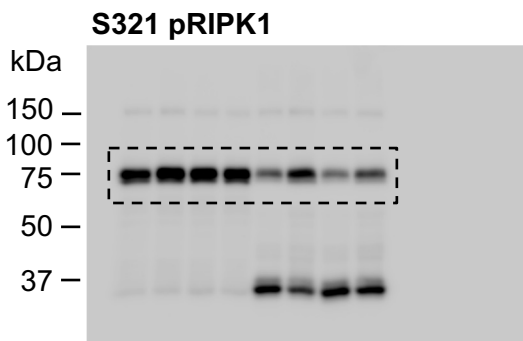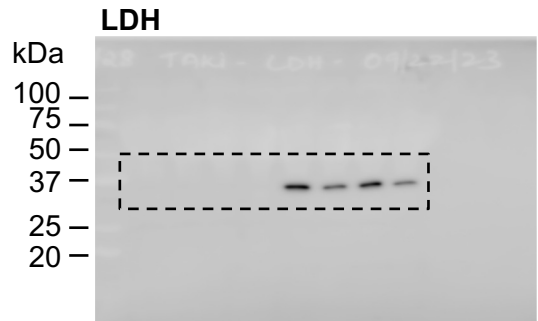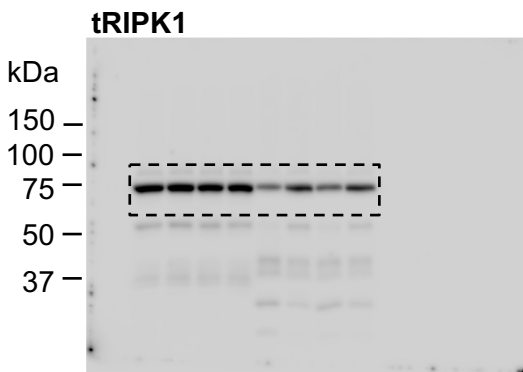

Uncropped blots corresponding to Fig. S1A and 1B

Fig. S1A

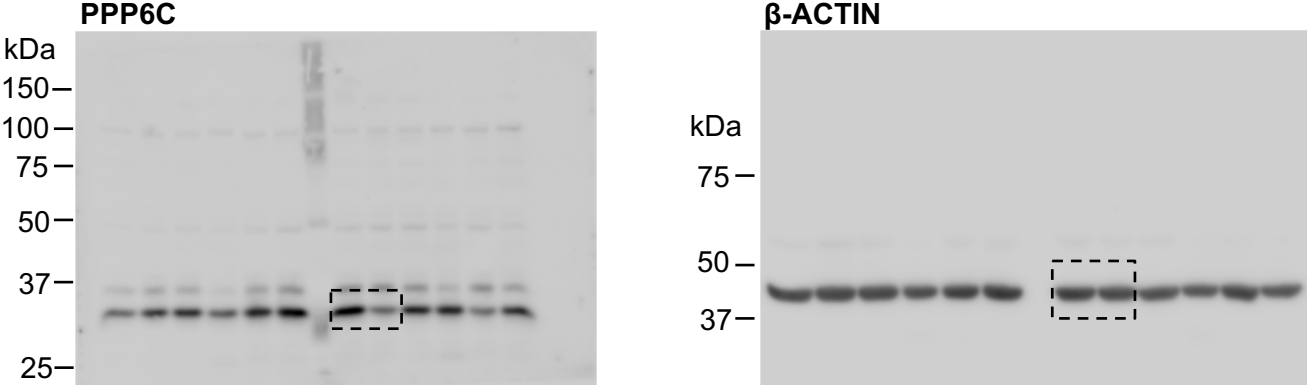

Fig. S1B

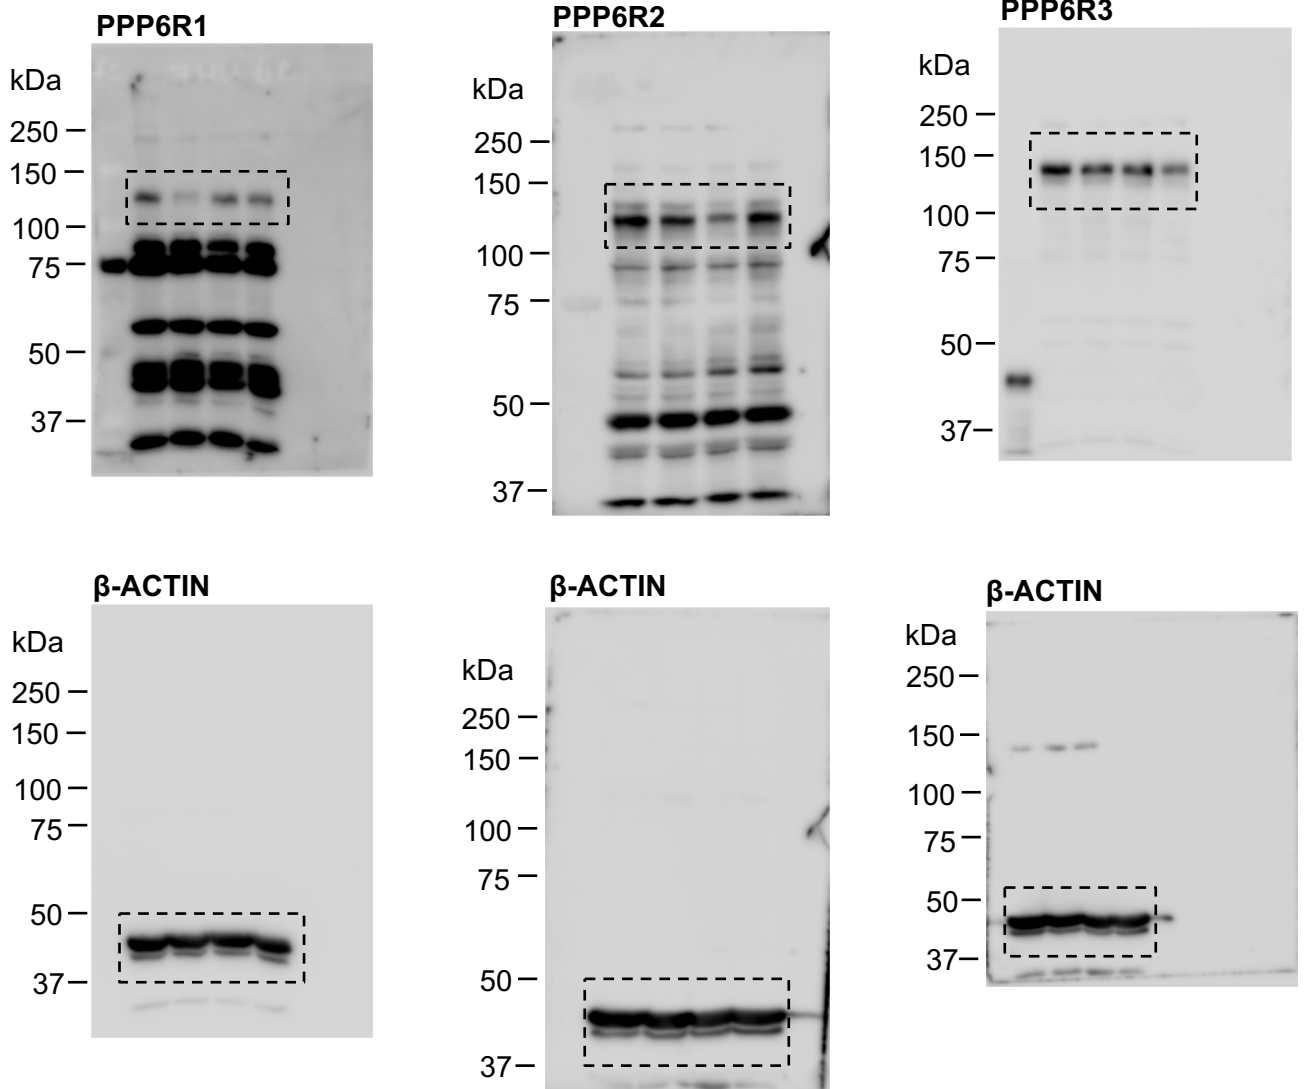

# Uncropped blots corresponding to Fig. S1D

### CASP1

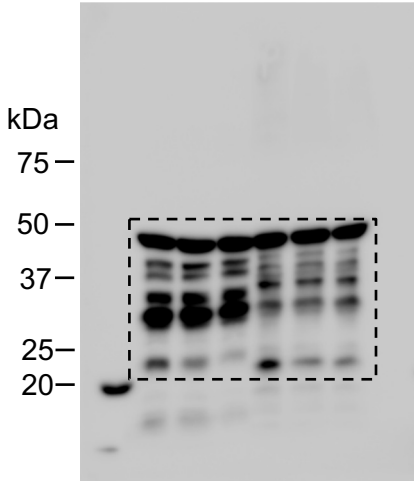

### CASP8 (HIGH EXPOSURE, PRO-FORM AND HIGHER MW CLEAVED FORMS)

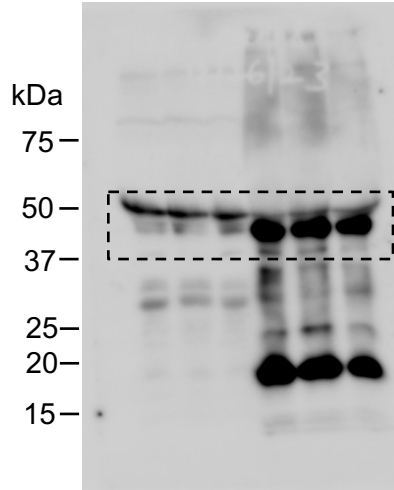

### CASP7

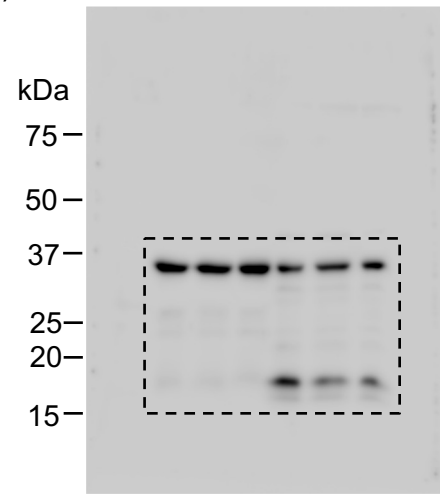

### GSDMD

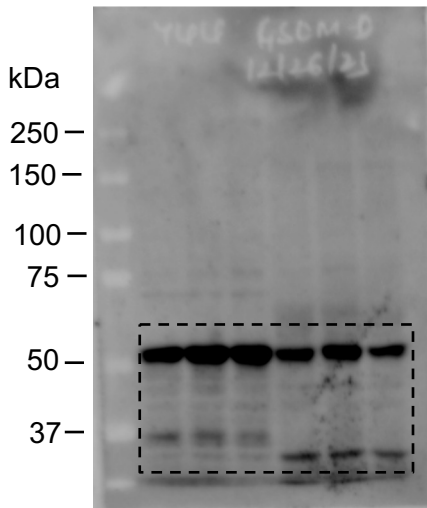

### CASP8 (LOW EXPOSURE, LOWER MW CLEAVED FORMS)

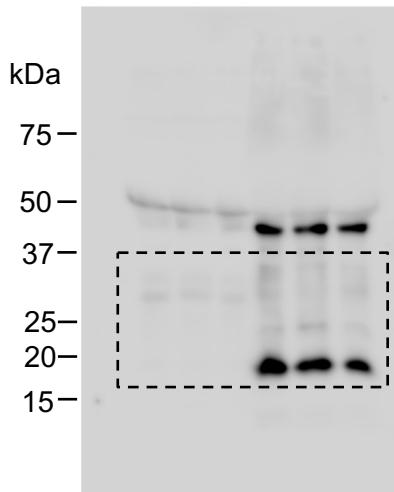

### pMLKL

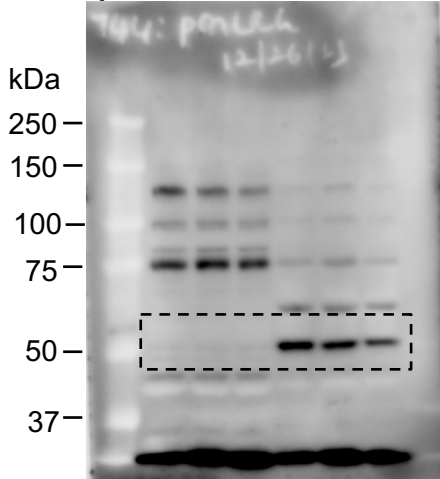

### GSDME

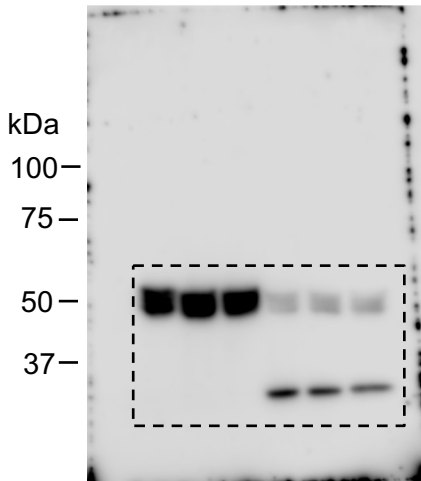

### CASP3

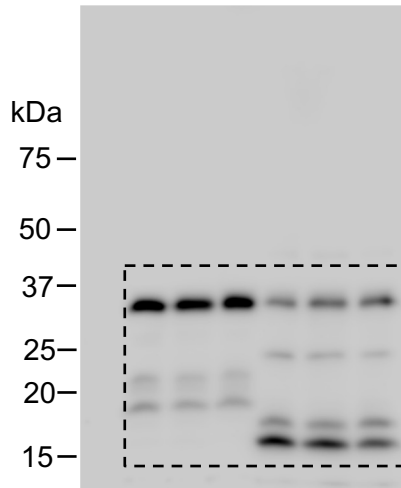

### tMLKL

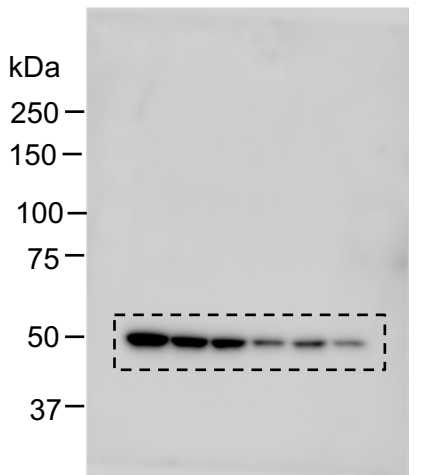

# Uncropped blots corresponding to Fig. S1D

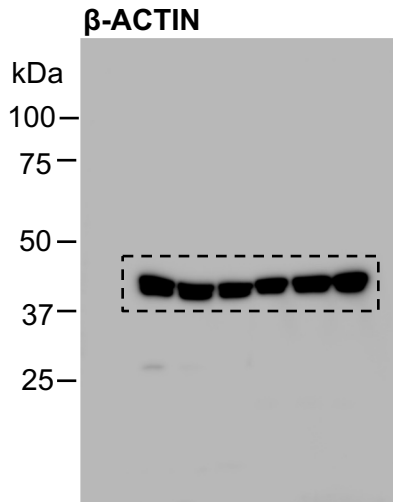

Supplement: 12915_2024_1901_MOESM2_ESM.pdf [file 12915_2024_1901_MOESM2_ESM.pdf]
