# Supplementary material for: The protein phosphatase PP6 promotes RIPK1-dependent PANoptosis
Source: PubMed Central journal article supplement (PMC11134900; doi:10.1186/s12915-024-01901-5), 2024-05-29
Supplement: 12915_2024_1901_MOESM1_ESM.pdf [file 12915_2024_1901_MOESM1_ESM.pdf]

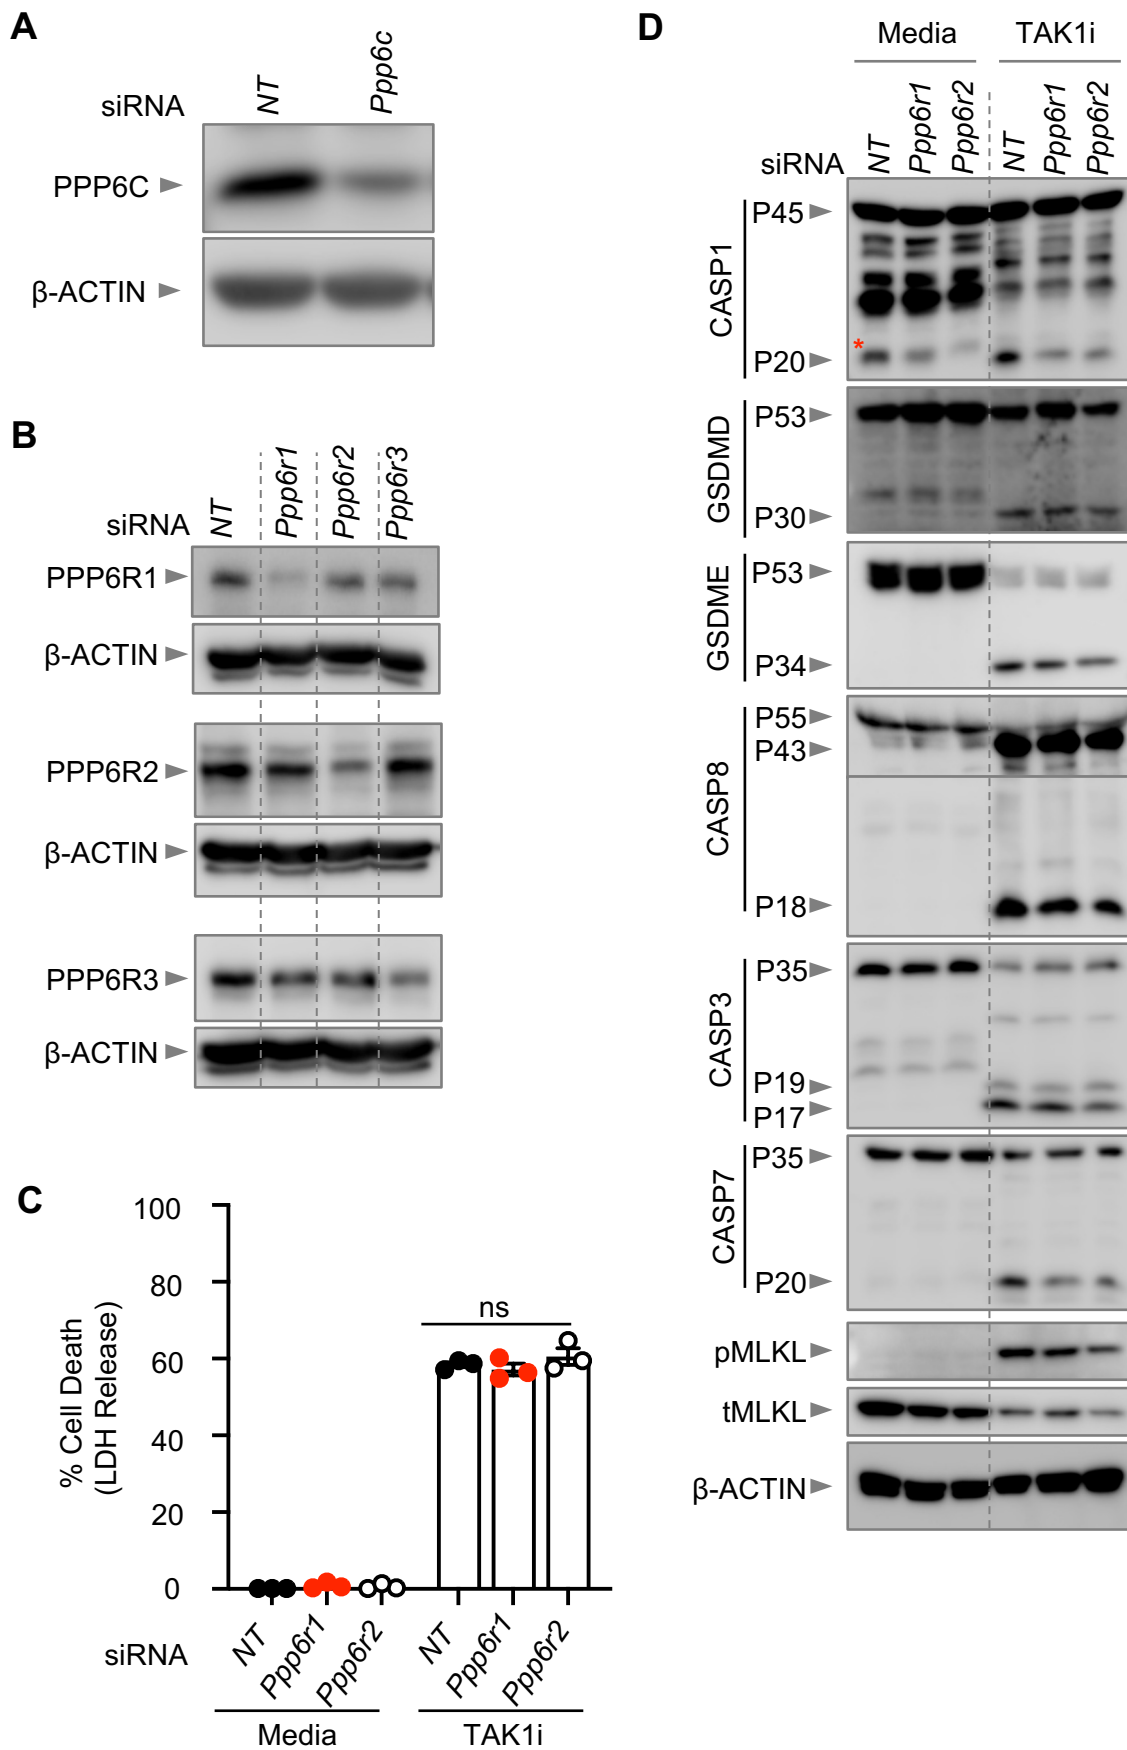

**Fig. S1**
